# Supplementary material
Source: Research Square preprint supplement (doi:10.21203/rs.3.rs-10056349/v1)
Supplement: Supplementary file 1 [file 6cb7804fb23233e23886d6dc.docx]

**Additional file 1**

**Supplemental Materials**

**Table S1** Results for physicians in PHCIs

| Year | *Gw* | *Gb* | *Gt* | *Gini* |
| --- | --- | --- | --- | --- |
| 2013 | 0.046 | 0.216 | 0.118 | 0.380 |
| 2014 | 0.045 | 0.222 | 0.114 | 0.380 |
| 2015 | 0.044 | 0.225 | 0.109 | 0.379 |
| 2016 | 0.044 | 0.227 | 0.107 | 0.377 |
| 2017 | 0.044 | 0.225 | 0.108 | 0.377 |
| 2018 | 0.046 | 0.224 | 0.112 | 0.382 |
| 2019 | 0.047 | 0.221 | 0.114 | 0.382 |
| 2020 | 0.046 | 0.224 | 0.111 | 0.382 |
| 2021 | 0.046 | 0.225 | 0.110 | 0.382 |
| 2022 | 0.046 | 0.232 | 0.110 | 0.388 |

**Table S2** Decomposition of differences in Dagum Gini coefficient for physicians in PHCIs by region

| Year | Northeast China | East China | Central China | North China | South China | Northwest China | Southwest China |
| --- | --- | --- | --- | --- | --- | --- | --- |
| 2013 | 0.098 | 0.281 | 0.087 | 0.294 | 0.408 | 0.320 | 0.436 |
| 2014 | 0.075 | 0.269 | 0.074 | 0.306 | 0.405 | 0.324 | 0.432 |
| 2015 | 0.065 | 0.272 | 0.071 | 0.306 | 0.407 | 0.317 | 0.413 |
| 2016 | 0.070 | 0.270 | 0.062 | 0.305 | 0.411 | 0.329 | 0.393 |
| 2017 | 0.078 | 0.277 | 0.067 | 0.308 | 0.416 | 0.330 | 0.385 |
| 2018 | 0.069 | 0.289 | 0.079 | 0.316 | 0.422 | 0.334 | 0.376 |
| 2019 | 0.059 | 0.295 | 0.095 | 0.324 | 0.413 | 0.348 | 0.368 |
| 2020 | 0.055 | 0.283 | 0.124 | 0.323 | 0.401 | 0.350 | 0.360 |
| 2021 | 0.068 | 0.277 | 0.135 | 0.320 | 0.399 | 0.372 | 0.361 |
| 2022 | 0.059 | 0.278 | 0.143 | 0.326 | 0.401 | 0.378 | 0.362 |

**Table S3** Results of Dagum Gini coefficient for pharmacists in PHCIs

| Year | *Gw* | *Gb* | *Gt* | *Gini* |
| --- | --- | --- | --- | --- |
| 2013 | 0.041 | 0.258 | 0.102 | 0.402 |
| 2014 | 0.041 | 0.254 | 0.102 | 0.397 |
| 2015 | 0.040 | 0.249 | 0.103 | 0.393 |
| 2016 | 0.040 | 0.249 | 0.103 | 0.392 |
| 2017 | 0.041 | 0.250 | 0.102 | 0.393 |
| 2018 | 0.041 | 0.248 | 0.103 | 0.392 |
| 2019 | 0.042 | 0.249 | 0.104 | 0.395 |
| 2020 | 0.042 | 0.251 | 0.100 | 0.393 |
| 2021 | 0.041 | 0.257 | 0.096 | 0.394 |
| 2022 | 0.042 | 0.264 | 0.096 | 0.402 |

**Table S4** Decomposition of differences in Dagum Gini coefficient for pharmacists in PHCIs by region

| Factor | Northeast China | East China | Central China | North China | South China | Northwest China | Southwest China |
| --- | --- | --- | --- | --- | --- | --- | --- |
| 2013 | 0.071 | 0.240 | 0.061 | 0.158 | 0.420 | 0.396 | 0.491 |
| 2014 | 0.063 | 0.235 | 0.054 | 0.165 | 0.400 | 0.395 | 0.474 |
| 2015 | 0.051 | 0.232 | 0.051 | 0.174 | 0.387 | 0.397 | 0.456 |
| 2016 | 0.055 | 0.233 | 0.045 | 0.179 | 0.381 | 0.397 | 0.440 |
| 2017 | 0.058 | 0.237 | 0.044 | 0.177 | 0.381 | 0.391 | 0.435 |
| 2018 | 0.072 | 0.240 | 0.047 | 0.191 | 0.380 | 0.377 | 0.422 |
| 2019 | 0.079 | 0.247 | 0.047 | 0.185 | 0.378 | 0.381 | 0.421 |
| 2020 | 0.055 | 0.244 | 0.061 | 0.179 | 0.370 | 0.385 | 0.410 |
| 2021 | 0.044 | 0.237 | 0.096 | 0.169 | 0.367 | 0.367 | 0.404 |
| 2022 | 0.040 | 0.253 | 0.093 | 0.169 | 0.369 | 0.364 | 0.404 |

**Table S5** Results of Dagum Gini coefficient for nurses in PHCIs

| Year | *Gw* | *Gb* | *Gt* | *Gini* |
| --- | --- | --- | --- | --- |
| 2013 | 0.043 | 0.233 | 0.095 | 0.371 |
| 2014 | 0.041 | 0.233 | 0.092 | 0.367 |
| 2015 | 0.041 | 0.235 | 0.091 | 0.366 |
| 2016 | 0.041 | 0.235 | 0.093 | 0.369 |
| 2017 | 0.042 | 0.231 | 0.098 | 0.371 |
| 2018 | 0.043 | 0.231 | 0.104 | 0.378 |
| 2019 | 0.043 | 0.240 | 0.102 | 0.384 |
| 2020 | 0.042 | 0.238 | 0.099 | 0.378 |
| 2021 | 0.041 | 0.241 | 0.096 | 0.379 |
| 2022 | 0.042 | 0.245 | 0.098 | 0.385 |

**Table S6** Decomposition of differences in Dagum Gini coefficient for nurses in PHCIs by region

| Factor | Northeast China | East China | Central China | North China | South China | Northwest China | Southwest China |
| --- | --- | --- | --- | --- | --- | --- | --- |
| 2013 | 0.134 | 0.280 | 0.051 | 0.201 | 0.367 | 0.338 | 0.376 |
| 2014 | 0.111 | 0.259 | 0.067 | 0.217 | 0.361 | 0.339 | 0.376 |
| 2015 | 0.111 | 0.254 | 0.066 | 0.208 | 0.366 | 0.339 | 0.364 |
| 2016 | 0.117 | 0.249 | 0.07 | 0.202 | 0.376 | 0.352 | 0.366 |
| 2017 | 0.111 | 0.254 | 0.069 | 0.205 | 0.385 | 0.350 | 0.371 |
| 2018 | 0.118 | 0.269 | 0.069 | 0.221 | 0.397 | 0.354 | 0.358 |
| 2019 | 0.115 | 0.269 | 0.046 | 0.219 | 0.400 | 0.363 | 0.359 |
| 2020 | 0.105 | 0.257 | 0.031 | 0.232 | 0.381 | 0.357 | 0.352 |
| 2021 | 0.116 | 0.247 | 0.037 | 0.241 | 0.382 | 0.350 | 0.351 |
| 2022 | 0.114 | 0.248 | 0.059 | 0.255 | 0.384 | 0.345 | 0.355 |

**Table S7** Agglomeration degree of health technicians in PHCIs, 2013-2022

| **Region** | **Dimension** | **2013** | **2014** | **2015** | **2016** | **2017** | **2018** | **2019** | **2020** | **2021** | **2022** |
| --- | --- | --- | --- | --- | --- | --- | --- | --- | --- | --- | --- |
| North China | HRAD | 0.736 | 0.737 | 0.738 | 0.733 | 0.744 | 0.751 | 0.749 | 0.737 | 0.747 | 0.740 |
| HRAD/PAD | 0.945 | 0.942 | 0.944 | 0.969 | 0.990 | 1.006 | 1.005 | 0.991 | 1.007 | 1.000 |
| Beijing | HRAD | 12.634 | 12.237 | 12.610 | 12.702 | 12.886 | 13.289 | 13.370 | 12.953 | 13.021 | 12.652 |
| HRAD/PAD | 1.378 | 1.311 | 1.339 | 1.334 | 1.354 | 1.398 | 1.408 | 1.365 | 1.372 | 1.336 |
| Tianjin | HRAD | 5.967 | 6.064 | 6.362 | 6.603 | 7.086 | 7.209 | 7.164 | 7.122 | 7.520 | 7.465 |
| HRAD/PAD | 0.684 | 0.675 | 0.694 | 0.772 | 0.848 | 0.880 | 0.873 | 0.866 | 0.924 | 0.924 |
| Hebei | HRAD | 2.232 | 2.302 | 2.302 | 2.292 | 2.365 | 2.452 | 2.446 | 2.437 | 2.477 | 2.513 |
| HRAD/PAD | 0.805 | 0.824 | 0.820 | 0.822 | 0.844 | 0.873 | 0.868 | 0.863 | 0.879 | 0.895 |
| Shanxi | HRAD | 1.636 | 1.612 | 1.555 | 1.495 | 1.465 | 1.433 | 1.426 | 1.384 | 1.395 | 1.357 |
| HRAD/PAD | 0.993 | 0.974 | 0.935 | 0.937 | 0.920 | 0.901 | 0.899 | 0.874 | 0.883 | 0.859 |
| Inner Mongolia | HRAD | 0.162 | 0.159 | 0.160 | 0.158 | 0.158 | 0.151 | 0.149 | 0.147 | 0.148 | 0.144 |
| HRAD/PAD | 1.076 | 1.057 | 1.060 | 1.082 | 1.079 | 1.040 | 1.028 | 1.019 | 1.023 | 0.996 |
| Northeast China | HRAD | 0.854 | 0.823 | 0.812 | 0.793 | 0.784 | 0.775 | 0.732 | 0.737 | 0.727 | 0.695 |
| HRAD/PAD | 0.882 | 0.855 | 0.850 | 0.890 | 0.896 | 0.901 | 0.864 | 0.885 | 0.882 | 0.850 |
| Liaoning | HRAD | 1.940 | 1.787 | 1.749 | 1.735 | 1.724 | 1.705 | 1.601 | 1.551 | 1.580 | 1.499 |
| HRAD/PAD | 0.906 | 0.835 | 0.819 | 0.822 | 0.820 | 0.815 | 0.768 | 0.748 | 0.766 | 0.733 |
| Jilin | HRAD | 0.988 | 0.997 | 1.024 | 0.995 | 0.960 | 1.010 | 0.947 | 1.043 | 1.005 | 0.954 |
| HRAD/PAD | 0.946 | 0.955 | 0.980 | 1.022 | 1.001 | 1.072 | 1.020 | 1.146 | 1.115 | 1.070 |
| Heilongjiang | HRAD | 0.465 | 0.457 | 0.438 | 0.422 | 0.424 | 0.396 | 0.379 | 0.365 | 0.355 | 0.345 |
| HRAD/PAD | 0.807 | 0.793 | 0.764 | 0.811 | 0.830 | 0.791 | 0.775 | 0.766 | 0.755 | 0.740 |
| East China | HRAD | 3.818 | 3.756 | 3.705 | 3.694 | 3.700 | 3.743 | 3.753 | 3.802 | 3.795 | 3.814 |
| HRAD/PAD | 1.084 | 1.067 | 1.053 | 1.036 | 1.036 | 1.046 | 1.048 | 1.058 | 1.053 | 1.056 |
| Shanghai | HRAD | 34.979 | 29.774 | 29.314 | 29.249 | 29.341 | 29.016 | 28.088 | 28.508 | 29.258 | 28.431 |
| HRAD/PAD | 1.283 | 1.087 | 1.075 | 1.050 | 1.054 | 1.039 | 1.003 | 1.015 | 1.041 | 1.018 |
| Jiangsu | HRAD | 5.649 | 5.839 | 5.877 | 5.950 | 6.180 | 6.485 | 6.543 | 6.457 | 6.368 | 6.439 |
| HRAD/PAD | 1.073 | 1.106 | 1.111 | 1.070 | 1.106 | 1.157 | 1.165 | 1.148 | 1.129 | 1.140 |
| Zhejiang | HRAD | 4.654 | 4.757 | 4.988 | 5.129 | 5.116 | 5.036 | 4.977 | 4.891 | 4.890 | 5.009 |
| HRAD/PAD | 1.256 | 1.281 | 1.336 | 1.253 | 1.230 | 1.191 | 1.158 | 1.122 | 1.109 | 1.130 |
| Anhui | HRAD | 2.380 | 2.384 | 2.330 | 2.357 | 2.327 | 2.304 | 2.397 | 2.808 | 2.877 | 3.027 |
| HRAD/PAD | 0.778 | 0.772 | 0.747 | 0.770 | 0.757 | 0.747 | 0.775 | 0.906 | 0.927 | 0.973 |
| Fujian | HRAD | 2.262 | 2.252 | 2.189 | 2.240 | 2.216 | 2.256 | 2.227 | 2.251 | 2.250 | 2.240 |
| HRAD/PAD | 1.045 | 1.032 | 0.994 | 0.972 | 0.950 | 0.958 | 0.938 | 0.943 | 0.937 | 0.933 |
| Jiangxi | HRAD | 1.571 | 1.629 | 1.574 | 1.534 | 1.492 | 1.434 | 1.434 | 1.447 | 1.465 | 1.417 |
| HRAD/PAD | 0.816 | 0.842 | 0.809 | 0.801 | 0.776 | 0.746 | 0.745 | 0.752 | 0.761 | 0.734 |
| Shandong | HRAD | 5.671 | 5.303 | 5.032 | 4.807 | 4.778 | 4.909 | 4.942 | 4.889 | 4.803 | 4.732 |
| HRAD/PAD | 1.276 | 1.187 | 1.120 | 1.056 | 1.043 | 1.067 | 1.071 | 1.054 | 1.035 | 1.020 |
| Central China | HRAD | 2.716 | 2.754 | 2.775 | 2.757 | 2.684 | 2.591 | 2.617 | 2.567 | 2.593 | 2.623 |
| HRAD/PAD | 0.985 | 1.000 | 1.008 | 1.008 | 0.983 | 0.950 | 0.961 | 0.950 | 0.959 | 0.971 |
| Henan | HRAD | 3.624 | 3.643 | 3.603 | 3.519 | 3.447 | 3.418 | 3.315 | 3.509 | 3.668 | 3.804 |
| HRAD/PAD | 0.904 | 0.906 | 0.892 | 0.845 | 0.823 | 0.814 | 0.786 | 0.829 | 0.872 | 0.905 |
| Hubei | HRAD | 2.457 | 2.582 | 2.616 | 2.627 | 2.523 | 2.407 | 2.227 | 2.116 | 2.170 | 2.144 |
| HRAD/PAD | 1.107 | 1.160 | 1.169 | 1.167 | 1.117 | 1.064 | 0.982 | 0.963 | 0.973 | 0.959 |
| Hunan | HRAD | 2.228 | 2.205 | 2.263 | 2.271 | 2.224 | 2.101 | 2.408 | 2.220 | 2.116 | 2.113 |
| HRAD/PAD | 0.992 | 0.975 | 0.993 | 1.021 | 0.999 | 0.943 | 1.080 | 0.995 | 0.952 | 0.953 |
| South China | HRAD | 2.562 | 2.612 | 2.682 | 2.737 | 2.751 | 2.778 | 2.713 | 2.737 | 2.754 | 2.781 |
| HRAD/PAD | 1.003 | 1.020 | 1.043 | 1.008 | 1.002 | 1.002 | 0.972 | 0.972 | 0.974 | 0.983 |
| Guangdong | HRAD | 4.012 | 4.037 | 4.175 | 4.307 | 4.383 | 4.507 | 4.383 | 4.328 | 4.385 | 4.445 |
| HRAD/PAD | 0.952 | 0.951 | 0.972 | 0.914 | 0.912 | 0.922 | 0.887 | 0.866 | 0.874 | 0.887 |
| Guangxi | HRAD | 1.577 | 1.640 | 1.665 | 1.669 | 1.641 | 1.603 | 1.575 | 1.629 | 1.603 | 1.618 |
| HRAD/PAD | 1.117 | 1.153 | 1.160 | 1.148 | 1.117 | 1.082 | 1.056 | 1.085 | 1.063 | 1.071 |
| Hainan | HRAD | 1.817 | 1.899 | 1.927 | 1.937 | 1.912 | 1.896 | 1.879 | 2.096 | 2.202 | 2.144 |
| HRAD/PAD | 1.011 | 1.047 | 1.053 | 1.007 | 0.979 | 0.961 | 0.940 | 1.031 | 1.075 | 1.039 |
| Southwest China | HRAD | 0.546 | 0.558 | 0.564 | 0.571 | 0.583 | 0.588 | 0.606 | 0.615 | 0.617 | 0.619 |
| HRAD/PAD | 0.929 | 0.949 | 0.958 | 0.968 | 0.987 | 0.995 | 1.024 | 1.038 | 1.042 | 1.045 |
| Chongqing | HRAD | 2.680 | 2.727 | 2.756 | 2.735 | 2.627 | 2.779 | 2.858 | 2.906 | 2.942 | 2.892 |
| HRAD/PAD | 1.046 | 1.056 | 1.059 | 1.019 | 0.968 | 1.018 | 1.039 | 1.049 | 1.061 | 1.043 |
| Sichuan | HRAD | 1.324 | 1.328 | 1.291 | 1.280 | 1.273 | 1.262 | 1.274 | 1.255 | 1.265 | 1.270 |
| HRAD/PAD | 1.116 | 1.115 | 1.075 | 1.060 | 1.049 | 1.037 | 1.042 | 1.024 | 1.032 | 1.036 |
| Guizhou | HRAD | 1.067 | 1.131 | 1.243 | 1.310 | 1.358 | 1.356 | 1.393 | 1.448 | 1.441 | 1.431 |
| HRAD/PAD | 0.755 | 0.799 | 0.872 | 0.864 | 0.885 | 0.879 | 0.897 | 0.930 | 0.927 | 0.920 |
| Yunnan | HRAD | 0.567 | 0.586 | 0.612 | 0.646 | 0.727 | 0.738 | 0.793 | 0.838 | 0.826 | 0.848 |
| HRAD/PAD | 0.670 | 0.689 | 0.715 | 0.765 | 0.858 | 0.870 | 0.932 | 0.984 | 0.976 | 1.001 |
| Tibet | HRAD | 0.014 | 0.016 | 0.016 | 0.015 | 0.015 | 0.016 | 0.018 | 0.018 | 0.019 | 0.018 |
| HRAD/PAD | 0.772 | 0.881 | 0.862 | 0.772 | 0.751 | 0.785 | 0.864 | 0.841 | 0.877 | 0.873 |
| Northwest China | HRAD | 0.240 | 0.241 | 0.238 | 0.238 | 0.236 | 0.231 | 0.232 | 0.223 | 0.214 | 0.210 |
| HRAD/PAD | 1.057 | 1.059 | 1.042 | 1.049 | 1.034 | 1.013 | 1.015 | 0.971 | 0.934 | 0.913 |
| Shaanxi | HRAD | 1.399 | 1.397 | 1.378 | 1.429 | 1.437 | 1.450 | 1.518 | 1.458 | 1.393 | 1.366 |
| HRAD/PAD | 1.074 | 1.069 | 1.050 | 1.066 | 1.064 | 1.067 | 1.113 | 1.065 | 1.019 | 0.998 |
| Gansu | HRAD | 0.479 | 0.476 | 0.462 | 0.445 | 0.431 | 0.409 | 0.398 | 0.383 | 0.378 | 0.363 |
| HRAD/PAD | 1.111 | 1.099 | 1.063 | 1.058 | 1.024 | 0.973 | 0.951 | 0.916 | 0.909 | 0.871 |
| Qinghai | HRAD | 0.055 | 0.053 | 0.052 | 0.048 | 0.053 | 0.053 | 0.053 | 0.051 | 0.049 | 0.048 |
| HRAD/PAD | 0.971 | 0.930 | 0.891 | 0.839 | 0.923 | 0.917 | 0.909 | 0.880 | 0.837 | 0.816 |
| Ningxia | HRAD | 0.561 | 0.564 | 0.580 | 0.602 | 0.607 | 0.668 | 0.675 | 0.717 | 0.707 | 0.707 |
| HRAD/PAD | 0.801 | 0.795 | 0.810 | 0.809 | 0.804 | 0.879 | 0.879 | 0.929 | 0.911 | 0.907 |
| Xinjiang | HRAD | 0.103 | 0.106 | 0.107 | 0.106 | 0.101 | 0.096 | 0.091 | 0.084 | 0.078 | 0.078 |
| HRAD/PAD | 1.064 | 1.080 | 1.058 | 1.022 | 0.958 | 0.889 | 0.837 | 0.762 | 0.710 | 0.707 |

**Table S8** Agglomeration degree of physicians in PHCIs, 2013-2022

| **Region** | **Dimension** | **2013** | **2014** | **2015** | **2016** | **2017** | **2018** | **2019** | **2020** | **2021** | **2022** |
| --- | --- | --- | --- | --- | --- | --- | --- | --- | --- | --- | --- |
| North China | HRAD | 0.839 | 0.848 | 0.851 | 0.845 | 0.863 | 0.874 | 0.886 | 0.867 | 0.874 | 0.862 |
| HRAD/PAD | 1.077 | 1.084 | 1.087 | 1.119 | 1.149 | 1.170 | 1.189 | 1.166 | 1.178 | 1.164 |
| Beijing | HRAD | 12.712 | 12.379 | 12.742 | 12.898 | 13.066 | 13.369 | 13.266 | 12.841 | 12.785 | 12.402 |
| HRAD/PAD | 1.386 | 1.326 | 1.353 | 1.355 | 1.373 | 1.406 | 1.397 | 1.353 | 1.347 | 1.310 |
| Tianjin | HRAD | 6.552 | 6.588 | 6.833 | 7.094 | 7.671 | 7.918 | 7.827 | 7.914 | 8.335 | 8.201 |
| HRAD/PAD | 0.751 | 0.733 | 0.745 | 0.829 | 0.918 | 0.966 | 0.954 | 0.963 | 1.024 | 1.015 |
| Hebei | HRAD | 2.747 | 2.864 | 2.908 | 2.929 | 3.061 | 3.179 | 3.275 | 3.227 | 3.242 | 3.251 |
| HRAD/PAD | 0.990 | 1.025 | 1.035 | 1.050 | 1.092 | 1.132 | 1.163 | 1.143 | 1.151 | 1.158 |
| Shanxi | HRAD | 1.874 | 1.878 | 1.814 | 1.726 | 1.689 | 1.653 | 1.675 | 1.608 | 1.623 | 1.575 |
| HRAD/PAD | 1.137 | 1.134 | 1.091 | 1.082 | 1.060 | 1.040 | 1.055 | 1.015 | 1.027 | 0.997 |
| Inner Mongolia | HRAD | 0.176 | 0.172 | 0.170 | 0.167 | 0.166 | 0.160 | 0.159 | 0.156 | 0.157 | 0.153 |
| HRAD/PAD | 1.172 | 1.145 | 1.129 | 1.141 | 1.135 | 1.096 | 1.097 | 1.083 | 1.091 | 1.061 |
| Northeast China | HRAD | 0.887 | 0.845 | 0.840 | 0.823 | 0.822 | 0.821 | 0.786 | 0.784 | 0.776 | 0.747 |
| HRAD/PAD | 0.916 | 0.877 | 0.880 | 0.925 | 0.940 | 0.954 | 0.927 | 0.941 | 0.941 | 0.913 |
| Liaoning | HRAD | 2.049 | 1.864 | 1.833 | 1.831 | 1.836 | 1.802 | 1.703 | 1.639 | 1.677 | 1.595 |
| HRAD/PAD | 0.958 | 0.871 | 0.858 | 0.868 | 0.874 | 0.861 | 0.817 | 0.790 | 0.814 | 0.779 |
| Jilin | HRAD | 1.035 | 1.044 | 1.074 | 1.052 | 1.016 | 1.093 | 1.029 | 1.096 | 1.066 | 1.013 |
| HRAD/PAD | 0.991 | 1.000 | 1.028 | 1.080 | 1.060 | 1.159 | 1.108 | 1.204 | 1.183 | 1.137 |
| Heilongjiang | HRAD | 0.469 | 0.452 | 0.440 | 0.422 | 0.433 | 0.411 | 0.406 | 0.396 | 0.383 | 0.380 |
| HRAD/PAD | 0.814 | 0.784 | 0.768 | 0.811 | 0.848 | 0.821 | 0.829 | 0.830 | 0.815 | 0.814 |
| East China | HRAD | 3.728 | 3.738 | 3.721 | 3.717 | 3.727 | 3.794 | 3.840 | 3.896 | 3.866 | 3.873 |
| HRAD/PAD | 1.058 | 1.061 | 1.058 | 1.043 | 1.044 | 1.061 | 1.072 | 1.084 | 1.072 | 1.072 |
| Shanghai | HRAD | 28.935 | 29.706 | 28.708 | 28.516 | 28.380 | 27.893 | 26.195 | 26.582 | 27.298 | 26.559 |
| HRAD/PAD | 1.061 | 1.085 | 1.053 | 1.024 | 1.019 | 0.998 | 0.935 | 0.946 | 0.972 | 0.951 |
| Jiangsu | HRAD | 5.958 | 6.147 | 6.257 | 6.378 | 6.473 | 6.700 | 6.792 | 6.654 | 6.384 | 6.356 |
| HRAD/PAD | 1.131 | 1.164 | 1.182 | 1.147 | 1.158 | 1.196 | 1.209 | 1.183 | 1.131 | 1.125 |
| Zhejiang | HRAD | 4.855 | 4.917 | 5.200 | 5.358 | 5.389 | 5.331 | 5.213 | 5.109 | 5.151 | 5.282 |
| HRAD/PAD | 1.310 | 1.324 | 1.393 | 1.309 | 1.296 | 1.261 | 1.213 | 1.172 | 1.168 | 1.191 |
| Anhui | HRAD | 2.488 | 2.516 | 2.481 | 2.511 | 2.481 | 2.431 | 2.512 | 3.016 | 3.030 | 3.151 |
| HRAD/PAD | 0.813 | 0.815 | 0.796 | 0.820 | 0.807 | 0.788 | 0.812 | 0.973 | 0.976 | 1.013 |
| Fujian | HRAD | 2.084 | 2.073 | 2.003 | 2.041 | 2.022 | 2.119 | 2.148 | 2.155 | 2.199 | 2.204 |
| HRAD/PAD | 0.963 | 0.949 | 0.910 | 0.886 | 0.867 | 0.900 | 0.905 | 0.903 | 0.916 | 0.917 |
| Jiangxi | HRAD | 1.469 | 1.550 | 1.497 | 1.438 | 1.380 | 1.331 | 1.371 | 1.403 | 1.391 | 1.333 |
| HRAD/PAD | 0.762 | 0.801 | 0.769 | 0.751 | 0.718 | 0.692 | 0.713 | 0.729 | 0.723 | 0.691 |
| Shandong | HRAD | 5.256 | 4.999 | 4.829 | 4.633 | 4.704 | 4.975 | 5.161 | 5.104 | 5.043 | 4.992 |
| HRAD/PAD | 1.183 | 1.119 | 1.074 | 1.018 | 1.027 | 1.082 | 1.119 | 1.100 | 1.086 | 1.076 |
| Central China | HRAD | 2.769 | 2.823 | 2.871 | 2.888 | 2.844 | 2.742 | 2.670 | 2.645 | 2.679 | 2.746 |
| HRAD/PAD | 1.004 | 1.025 | 1.043 | 1.055 | 1.042 | 1.006 | 0.980 | 0.979 | 0.992 | 1.016 |
| Henan | HRAD | 3.791 | 3.812 | 3.791 | 3.711 | 3.659 | 3.649 | 3.613 | 3.877 | 4.080 | 4.262 |
| HRAD/PAD | 0.946 | 0.949 | 0.939 | 0.891 | 0.874 | 0.869 | 0.857 | 0.916 | 0.969 | 1.014 |
| Hubei | HRAD | 2.314 | 2.469 | 2.479 | 2.514 | 2.419 | 2.288 | 2.091 | 1.985 | 2.021 | 2.040 |
| HRAD/PAD | 1.043 | 1.110 | 1.108 | 1.117 | 1.071 | 1.011 | 0.922 | 0.903 | 0.906 | 0.912 |
| Hunan | HRAD | 2.363 | 2.352 | 2.490 | 2.568 | 2.575 | 2.425 | 2.435 | 2.253 | 2.153 | 2.172 |
| HRAD/PAD | 1.052 | 1.040 | 1.093 | 1.154 | 1.156 | 1.088 | 1.092 | 1.010 | 0.968 | 0.979 |
| South China | HRAD | 2.405 | 2.415 | 2.453 | 2.495 | 2.485 | 2.490 | 2.418 | 2.436 | 2.443 | 2.456 |
| HRAD/PAD | 0.942 | 0.944 | 0.954 | 0.919 | 0.905 | 0.898 | 0.866 | 0.865 | 0.864 | 0.868 |
| Guangdong | HRAD | 4.000 | 4.004 | 4.088 | 4.187 | 4.208 | 4.279 | 4.088 | 4.050 | 4.072 | 4.103 |
| HRAD/PAD | 0.949 | 0.943 | 0.952 | 0.889 | 0.876 | 0.876 | 0.827 | 0.811 | 0.811 | 0.819 |
| Guangxi | HRAD | 1.335 | 1.337 | 1.341 | 1.347 | 1.320 | 1.274 | 1.279 | 1.305 | 1.282 | 1.290 |
| HRAD/PAD | 0.945 | 0.940 | 0.934 | 0.927 | 0.898 | 0.860 | 0.858 | 0.868 | 0.850 | 0.854 |
| Hainan | HRAD | 1.497 | 1.584 | 1.621 | 1.604 | 1.556 | 1.577 | 1.591 | 1.835 | 1.969 | 1.916 |
| HRAD/PAD | 0.833 | 0.873 | 0.886 | 0.834 | 0.797 | 0.799 | 0.796 | 0.902 | 0.961 | 0.929 |
| Southwest China | HRAD | 0.567 | 0.560 | 0.549 | 0.544 | 0.540 | 0.539 | 0.554 | 0.560 | 0.560 | 0.562 |
| HRAD/PAD | 0.964 | 0.952 | 0.933 | 0.923 | 0.915 | 0.912 | 0.936 | 0.944 | 0.946 | 0.949 |
| Chongqing | HRAD | 2.831 | 2.804 | 2.790 | 2.732 | 2.607 | 2.749 | 2.836 | 2.861 | 2.872 | 2.848 |
| HRAD/PAD | 1.104 | 1.086 | 1.071 | 1.018 | 0.961 | 1.007 | 1.031 | 1.033 | 1.036 | 1.027 |
| Sichuan | HRAD | 1.460 | 1.437 | 1.361 | 1.298 | 1.257 | 1.221 | 1.228 | 1.210 | 1.223 | 1.223 |
| HRAD/PAD | 1.231 | 1.206 | 1.134 | 1.075 | 1.037 | 1.003 | 1.005 | 0.987 | 0.998 | 0.998 |
| Guizhou | HRAD | 0.919 | 0.930 | 1.002 | 1.075 | 1.101 | 1.097 | 1.136 | 1.200 | 1.200 | 1.188 |
| HRAD/PAD | 0.650 | 0.657 | 0.703 | 0.708 | 0.717 | 0.711 | 0.731 | 0.771 | 0.772 | 0.763 |
| Yunnan | HRAD | 0.566 | 0.546 | 0.546 | 0.574 | 0.608 | 0.617 | 0.653 | 0.683 | 0.661 | 0.682 |
| HRAD/PAD | 0.670 | 0.642 | 0.639 | 0.680 | 0.718 | 0.727 | 0.768 | 0.802 | 0.781 | 0.805 |
| Tibet | HRAD | 0.012 | 0.013 | 0.013 | 0.014 | 0.016 | 0.016 | 0.018 | 0.017 | 0.018 | 0.018 |
| HRAD/PAD | 0.648 | 0.731 | 0.718 | 0.702 | 0.776 | 0.759 | 0.881 | 0.779 | 0.834 | 0.853 |
| Northwest China | HRAD | 0.200 | 0.199 | 0.197 | 0.199 | 0.201 | 0.197 | 0.201 | 0.193 | 0.192 | 0.189 |
| HRAD/PAD | 0.883 | 0.875 | 0.863 | 0.877 | 0.880 | 0.862 | 0.876 | 0.842 | 0.839 | 0.822 |
| Shaanxi | HRAD | 1.116 | 1.094 | 1.054 | 1.099 | 1.129 | 1.143 | 1.226 | 1.198 | 1.254 | 1.254 |
| HRAD/PAD | 0.857 | 0.838 | 0.803 | 0.820 | 0.836 | 0.841 | 0.898 | 0.876 | 0.917 | 0.916 |
| Gansu | HRAD | 0.365 | 0.375 | 0.377 | 0.380 | 0.378 | 0.361 | 0.356 | 0.343 | 0.343 | 0.329 |
| HRAD/PAD | 0.847 | 0.867 | 0.869 | 0.902 | 0.898 | 0.859 | 0.848 | 0.821 | 0.824 | 0.791 |
| Qinghai | HRAD | 0.059 | 0.052 | 0.051 | 0.047 | 0.052 | 0.051 | 0.051 | 0.050 | 0.046 | 0.044 |
| HRAD/PAD | 1.036 | 0.913 | 0.878 | 0.818 | 0.904 | 0.887 | 0.884 | 0.854 | 0.788 | 0.756 |
| Ningxia | HRAD | 0.583 | 0.574 | 0.593 | 0.599 | 0.595 | 0.633 | 0.650 | 0.671 | 0.640 | 0.634 |
| HRAD/PAD | 0.833 | 0.810 | 0.829 | 0.805 | 0.789 | 0.832 | 0.846 | 0.869 | 0.824 | 0.813 |
| Xinjiang | HRAD | 0.091 | 0.091 | 0.092 | 0.092 | 0.089 | 0.084 | 0.081 | 0.074 | 0.068 | 0.066 |
| HRAD/PAD | 0.943 | 0.932 | 0.914 | 0.885 | 0.842 | 0.780 | 0.742 | 0.670 | 0.618 | 0.598 |

**Table S9** Agglomeration degree of pharmacists in PHCIs, 2013-2022

| **Region** | **Dimension** | **2013** | **2014** | **2015** | **2016** | **2017** | **2018** | **2019** | **2020** | **2021** | **2022** |
| --- | --- | --- | --- | --- | --- | --- | --- | --- | --- | --- | --- |
| North China | HRAD | 0.734 | 0.728 | 0.738 | 0.741 | 0.752 | 0.768 | 0.765 | 0.755 | 0.751 | 0.750 |
| HRAD/PAD | 0.942 | 0.931 | 0.944 | 0.980 | 1.001 | 1.028 | 1.027 | 1.016 | 1.012 | 1.014 |
| Beijing | HRAD | 17.326 | 17.398 | 18.229 | 18.520 | 18.478 | 19.088 | 19.804 | 19.393 | 18.715 | 18.971 |
| HRAD/PAD | 1.889 | 1.864 | 1.936 | 1.946 | 1.942 | 2.008 | 2.085 | 2.043 | 1.972 | 2.003 |
| Tianjin | HRAD | 8.159 | 7.971 | 8.283 | 8.807 | 9.622 | 9.983 | 10.540 | 11.019 | 11.608 | 11.882 |
| HRAD/PAD | 0.935 | 0.887 | 0.903 | 1.030 | 1.151 | 1.218 | 1.284 | 1.340 | 1.427 | 1.471 |
| Hebei | HRAD | 1.461 | 1.505 | 1.511 | 1.567 | 1.640 | 1.765 | 1.698 | 1.669 | 1.670 | 1.666 |
| HRAD/PAD | 0.527 | 0.539 | 0.538 | 0.562 | 0.585 | 0.628 | 0.603 | 0.591 | 0.593 | 0.593 |
| Shanxi | HRAD | 1.301 | 1.241 | 1.170 | 1.116 | 1.093 | 1.066 | 1.056 | 1.023 | 1.037 | 1.021 |
| HRAD/PAD | 0.789 | 0.749 | 0.703 | 0.700 | 0.686 | 0.671 | 0.665 | 0.646 | 0.657 | 0.646 |
| Inner Mongolia | HRAD | 0.238 | 0.232 | 0.240 | 0.231 | 0.230 | 0.223 | 0.216 | 0.212 | 0.207 | 0.203 |
| HRAD/PAD | 1.587 | 1.540 | 1.587 | 1.580 | 1.576 | 1.529 | 1.485 | 1.469 | 1.436 | 1.409 |
| Northeast China | HRAD | 0.768 | 0.735 | 0.726 | 0.698 | 0.689 | 0.656 | 0.623 | 0.624 | 0.601 | 0.562 |
| HRAD/PAD | 0.793 | 0.764 | 0.761 | 0.784 | 0.787 | 0.763 | 0.736 | 0.749 | 0.729 | 0.687 |
| Liaoning | HRAD | 1.609 | 1.502 | 1.450 | 1.414 | 1.414 | 1.402 | 1.340 | 1.308 | 1.237 | 1.149 |
| HRAD/PAD | 0.752 | 0.702 | 0.679 | 0.670 | 0.673 | 0.670 | 0.643 | 0.630 | 0.600 | 0.562 |
| Jilin | HRAD | 0.901 | 0.868 | 0.891 | 0.855 | 0.842 | 0.786 | 0.726 | 0.796 | 0.792 | 0.749 |
| HRAD/PAD | 0.863 | 0.831 | 0.853 | 0.877 | 0.878 | 0.833 | 0.781 | 0.874 | 0.878 | 0.840 |
| Heilongjiang | HRAD | 0.456 | 0.446 | 0.438 | 0.415 | 0.404 | 0.375 | 0.362 | 0.345 | 0.329 | 0.307 |
| HRAD/PAD | 0.790 | 0.774 | 0.764 | 0.798 | 0.791 | 0.750 | 0.739 | 0.723 | 0.701 | 0.658 |
| East China | HRAD | 4.250 | 4.270 | 4.219 | 4.221 | 4.242 | 4.217 | 4.237 | 4.254 | 4.257 | 4.245 |
| HRAD/PAD | 1.207 | 1.213 | 1.199 | 1.184 | 1.188 | 1.179 | 1.183 | 1.183 | 1.181 | 1.175 |
| Shanghai | HRAD | 32.563 | 33.204 | 34.476 | 34.538 | 34.529 | 34.539 | 34.003 | 34.357 | 34.192 | 33.467 |
| HRAD/PAD | 1.194 | 1.212 | 1.265 | 1.240 | 1.240 | 1.236 | 1.214 | 1.223 | 1.217 | 1.198 |
| Jiangsu | HRAD | 6.153 | 6.261 | 6.205 | 6.257 | 6.653 | 6.918 | 7.128 | 7.108 | 7.152 | 7.588 |
| HRAD/PAD | 1.168 | 1.186 | 1.173 | 1.125 | 1.191 | 1.235 | 1.269 | 1.264 | 1.267 | 1.343 |
| Zhejiang | HRAD | 6.173 | 6.310 | 6.464 | 6.606 | 6.630 | 6.763 | 6.781 | 6.673 | 6.423 | 6.298 |
| HRAD/PAD | 1.666 | 1.699 | 1.731 | 1.614 | 1.594 | 1.599 | 1.578 | 1.531 | 1.457 | 1.421 |
| Anhui | HRAD | 2.024 | 2.062 | 2.063 | 2.063 | 2.055 | 2.033 | 2.037 | 2.101 | 2.053 | 1.994 |
| HRAD/PAD | 0.661 | 0.668 | 0.662 | 0.674 | 0.668 | 0.659 | 0.659 | 0.678 | 0.662 | 0.641 |
| Fujian | HRAD | 3.452 | 3.453 | 3.311 | 3.395 | 3.311 | 3.177 | 3.186 | 3.233 | 3.195 | 3.164 |
| HRAD/PAD | 1.595 | 1.582 | 1.504 | 1.474 | 1.420 | 1.350 | 1.343 | 1.355 | 1.330 | 1.317 |
| Jiangxi | HRAD | 2.259 | 2.255 | 2.172 | 2.071 | 1.987 | 1.909 | 1.846 | 1.854 | 2.171 | 2.018 |
| HRAD/PAD | 1.172 | 1.165 | 1.116 | 1.081 | 1.034 | 0.993 | 0.960 | 0.963 | 1.128 | 1.046 |
| Shandong | HRAD | 5.265 | 5.144 | 4.965 | 4.882 | 4.867 | 4.674 | 4.698 | 4.751 | 4.651 | 4.645 |
| HRAD/PAD | 1.185 | 1.151 | 1.105 | 1.072 | 1.063 | 1.016 | 1.018 | 1.024 | 1.002 | 1.001 |
| Central China | HRAD | 2.727 | 2.646 | 2.560 | 2.492 | 2.419 | 2.303 | 2.254 | 2.223 | 2.301 | 2.237 |
| HRAD/PAD | 0.989 | 0.961 | 0.930 | 0.911 | 0.886 | 0.845 | 0.828 | 0.823 | 0.852 | 0.828 |
| Henan | HRAD | 2.779 | 2.835 | 2.850 | 2.835 | 2.915 | 2.820 | 2.749 | 2.813 | 3.196 | 3.029 |
| HRAD/PAD | 0.693 | 0.705 | 0.706 | 0.681 | 0.697 | 0.671 | 0.652 | 0.664 | 0.759 | 0.721 |
| Hubei | HRAD | 2.532 | 2.421 | 2.310 | 2.258 | 2.139 | 2.042 | 1.987 | 1.910 | 1.865 | 1.773 |
| HRAD/PAD | 1.141 | 1.088 | 1.032 | 1.003 | 0.947 | 0.902 | 0.876 | 0.869 | 0.836 | 0.793 |
| Hunan | HRAD | 2.856 | 2.696 | 2.552 | 2.428 | 2.273 | 2.125 | 2.099 | 2.033 | 1.979 | 2.019 |
| HRAD/PAD | 1.271 | 1.192 | 1.120 | 1.092 | 1.021 | 0.954 | 0.941 | 0.911 | 0.890 | 0.910 |
| South China | HRAD | 2.807 | 2.850 | 2.998 | 3.070 | 3.108 | 3.180 | 3.188 | 3.228 | 3.242 | 3.369 |
| HRAD/PAD | 1.099 | 1.113 | 1.166 | 1.131 | 1.132 | 1.147 | 1.142 | 1.146 | 1.146 | 1.191 |
| Guangdong | HRAD | 4.764 | 4.626 | 4.711 | 4.748 | 4.798 | 4.890 | 4.876 | 4.872 | 4.852 | 5.060 |
| HRAD/PAD | 1.131 | 1.090 | 1.097 | 1.008 | 0.999 | 1.001 | 0.986 | 0.975 | 0.967 | 1.010 |
| Guangxi | HRAD | 1.513 | 1.691 | 1.904 | 2.011 | 2.047 | 2.119 | 2.142 | 2.198 | 2.236 | 2.319 |
| HRAD/PAD | 1.071 | 1.188 | 1.326 | 1.383 | 1.394 | 1.431 | 1.436 | 1.463 | 1.483 | 1.535 |
| Hainan | HRAD | 1.556 | 1.615 | 1.644 | 1.662 | 1.643 | 1.628 | 1.640 | 1.795 | 1.824 | 1.831 |
| HRAD/PAD | 0.865 | 0.890 | 0.898 | 0.865 | 0.842 | 0.825 | 0.821 | 0.883 | 0.890 | 0.888 |
| Southwest China | HRAD | 0.417 | 0.431 | 0.437 | 0.444 | 0.445 | 0.466 | 0.480 | 0.487 | 0.495 | 0.508 |
| HRAD/PAD | 0.710 | 0.734 | 0.742 | 0.752 | 0.754 | 0.789 | 0.812 | 0.821 | 0.837 | 0.859 |
| Chongqing | HRAD | 2.248 | 2.311 | 2.415 | 2.372 | 2.266 | 2.445 | 2.492 | 2.472 | 2.574 | 2.564 |
| HRAD/PAD | 0.877 | 0.895 | 0.927 | 0.884 | 0.835 | 0.896 | 0.906 | 0.892 | 0.929 | 0.924 |
| Sichuan | HRAD | 1.185 | 1.191 | 1.154 | 1.147 | 1.146 | 1.167 | 1.204 | 1.202 | 1.205 | 1.250 |
| HRAD/PAD | 0.999 | 1.000 | 0.962 | 0.950 | 0.944 | 0.959 | 0.985 | 0.981 | 0.984 | 1.020 |
| Guizhou | HRAD | 0.616 | 0.698 | 0.789 | 0.870 | 0.948 | 0.988 | 1.036 | 1.079 | 1.075 | 1.089 |
| HRAD/PAD | 0.436 | 0.493 | 0.554 | 0.574 | 0.617 | 0.641 | 0.667 | 0.693 | 0.691 | 0.700 |
| Yunnan | HRAD | 0.282 | 0.305 | 0.321 | 0.338 | 0.333 | 0.376 | 0.382 | 0.403 | 0.427 | 0.443 |
| HRAD/PAD | 0.334 | 0.359 | 0.375 | 0.401 | 0.394 | 0.443 | 0.449 | 0.473 | 0.504 | 0.524 |
| Tibet | HRAD | 0.006 | 0.007 | 0.007 | 0.009 | 0.009 | 0.010 | 0.011 | 0.013 | 0.013 | 0.015 |
| HRAD/PAD | 0.327 | 0.389 | 0.355 | 0.447 | 0.469 | 0.498 | 0.533 | 0.594 | 0.616 | 0.701 |
| Northwest China | HRAD | 0.212 | 0.216 | 0.216 | 0.218 | 0.216 | 0.217 | 0.219 | 0.215 | 0.200 | 0.196 |
| HRAD/PAD | 0.932 | 0.949 | 0.947 | 0.962 | 0.949 | 0.952 | 0.958 | 0.936 | 0.871 | 0.854 |
| Shaanxi | HRAD | 1.494 | 1.517 | 1.524 | 1.563 | 1.546 | 1.538 | 1.566 | 1.542 | 1.358 | 1.337 |
| HRAD/PAD | 1.148 | 1.162 | 1.161 | 1.167 | 1.145 | 1.131 | 1.148 | 1.127 | 0.993 | 0.977 |
| Gansu | HRAD | 0.348 | 0.351 | 0.348 | 0.333 | 0.326 | 0.325 | 0.329 | 0.326 | 0.324 | 0.309 |
| HRAD/PAD | 0.806 | 0.812 | 0.800 | 0.790 | 0.773 | 0.773 | 0.785 | 0.780 | 0.778 | 0.742 |
| Qinghai | HRAD | 0.048 | 0.046 | 0.044 | 0.045 | 0.047 | 0.055 | 0.053 | 0.052 | 0.049 | 0.050 |
| HRAD/PAD | 0.837 | 0.797 | 0.766 | 0.778 | 0.813 | 0.947 | 0.913 | 0.894 | 0.844 | 0.860 |
| Ningxia | HRAD | 0.730 | 0.754 | 0.755 | 0.787 | 0.829 | 0.906 | 0.948 | 0.889 | 0.901 | 0.887 |
| HRAD/PAD | 1.042 | 1.063 | 1.056 | 1.058 | 1.098 | 1.191 | 1.235 | 1.152 | 1.161 | 1.137 |
| Xinjiang | HRAD | 0.069 | 0.072 | 0.074 | 0.076 | 0.073 | 0.070 | 0.068 | 0.067 | 0.062 | 0.062 |
| HRAD/PAD | 0.711 | 0.738 | 0.731 | 0.729 | 0.689 | 0.652 | 0.624 | 0.601 | 0.562 | 0.561 |

**Table S10** Agglomeration degree of nurses in PHCIs, 2013-2022

| **Region** | **Dimension** | **2013** | **2014** | **2015** | **2016** | **2017** | **2018** | **2019** | **2020** | **2021** | **2022** |
| --- | --- | --- | --- | --- | --- | --- | --- | --- | --- | --- | --- |
| North China | HRAD | 0.734 | 0.728 | 0.738 | 0.741 | 0.752 | 0.768 | 0.765 | 0.755 | 0.751 | 0.750 |
| HRAD/PAD | 0.942 | 0.931 | 0.944 | 0.980 | 1.001 | 1.028 | 1.027 | 1.016 | 1.012 | 1.014 |
| Beijing | HRAD | 17.326 | 17.398 | 18.229 | 18.520 | 18.478 | 19.088 | 19.804 | 19.393 | 18.715 | 18.971 |
| HRAD/PAD | 1.889 | 1.864 | 1.936 | 1.946 | 1.942 | 2.008 | 2.085 | 2.043 | 1.972 | 2.003 |
| Tianjin | HRAD | 8.159 | 7.971 | 8.283 | 8.807 | 9.622 | 9.983 | 10.540 | 11.019 | 11.608 | 11.882 |
| HRAD/PAD | 0.935 | 0.887 | 0.903 | 1.030 | 1.151 | 1.218 | 1.284 | 1.340 | 1.427 | 1.471 |
| Hebei | HRAD | 1.461 | 1.505 | 1.511 | 1.567 | 1.640 | 1.765 | 1.698 | 1.669 | 1.670 | 1.666 |
| HRAD/PAD | 0.527 | 0.539 | 0.538 | 0.562 | 0.585 | 0.628 | 0.603 | 0.591 | 0.593 | 0.593 |
| Shanxi | HRAD | 1.301 | 1.241 | 1.170 | 1.116 | 1.093 | 1.066 | 1.056 | 1.023 | 1.037 | 1.021 |
| HRAD/PAD | 0.789 | 0.749 | 0.703 | 0.700 | 0.686 | 0.671 | 0.665 | 0.646 | 0.657 | 0.646 |
| Inner Mongolia | HRAD | 0.238 | 0.232 | 0.240 | 0.231 | 0.230 | 0.223 | 0.216 | 0.212 | 0.207 | 0.203 |
| HRAD/PAD | 1.587 | 1.540 | 1.587 | 1.580 | 1.576 | 1.529 | 1.485 | 1.469 | 1.436 | 1.409 |
| Northeast China | HRAD | 0.768 | 0.735 | 0.726 | 0.698 | 0.689 | 0.656 | 0.623 | 0.624 | 0.601 | 0.562 |
| HRAD/PAD | 0.793 | 0.764 | 0.761 | 0.784 | 0.787 | 0.763 | 0.736 | 0.749 | 0.729 | 0.687 |
| Liaoning | HRAD | 1.609 | 1.502 | 1.450 | 1.414 | 1.414 | 1.402 | 1.340 | 1.308 | 1.237 | 1.149 |
| HRAD/PAD | 0.752 | 0.702 | 0.679 | 0.670 | 0.673 | 0.670 | 0.643 | 0.630 | 0.600 | 0.562 |
| Jilin | HRAD | 0.901 | 0.868 | 0.891 | 0.855 | 0.842 | 0.786 | 0.726 | 0.796 | 0.792 | 0.749 |
| HRAD/PAD | 0.863 | 0.831 | 0.853 | 0.877 | 0.878 | 0.833 | 0.781 | 0.874 | 0.878 | 0.840 |
| Heilongjiang | HRAD | 0.456 | 0.446 | 0.438 | 0.415 | 0.404 | 0.375 | 0.362 | 0.345 | 0.329 | 0.307 |
| HRAD/PAD | 0.790 | 0.774 | 0.764 | 0.798 | 0.791 | 0.750 | 0.739 | 0.723 | 0.701 | 0.658 |
| East China | HRAD | 4.250 | 4.270 | 4.219 | 4.221 | 4.242 | 4.217 | 4.237 | 4.254 | 4.257 | 4.245 |
| HRAD/PAD | 1.207 | 1.213 | 1.199 | 1.184 | 1.188 | 1.179 | 1.183 | 1.183 | 1.181 | 1.175 |
| Shanghai | HRAD | 32.563 | 33.204 | 34.476 | 34.538 | 34.529 | 34.539 | 34.003 | 34.357 | 34.192 | 33.467 |
| HRAD/PAD | 1.194 | 1.212 | 1.265 | 1.240 | 1.240 | 1.236 | 1.214 | 1.223 | 1.217 | 1.198 |
| Jiangsu | HRAD | 6.153 | 6.261 | 6.205 | 6.257 | 6.653 | 6.918 | 7.128 | 7.108 | 7.152 | 7.588 |
| HRAD/PAD | 1.168 | 1.186 | 1.173 | 1.125 | 1.191 | 1.235 | 1.269 | 1.264 | 1.267 | 1.343 |
| Zhejiang | HRAD | 6.173 | 6.310 | 6.464 | 6.606 | 6.630 | 6.763 | 6.781 | 6.673 | 6.423 | 6.298 |
| HRAD/PAD | 1.666 | 1.699 | 1.731 | 1.614 | 1.594 | 1.599 | 1.578 | 1.531 | 1.457 | 1.421 |
| Anhui | HRAD | 2.024 | 2.062 | 2.063 | 2.063 | 2.055 | 2.033 | 2.037 | 2.101 | 2.053 | 1.994 |
| HRAD/PAD | 0.661 | 0.668 | 0.662 | 0.674 | 0.668 | 0.659 | 0.659 | 0.678 | 0.662 | 0.641 |
| Fujian | HRAD | 3.452 | 3.453 | 3.311 | 3.395 | 3.311 | 3.177 | 3.186 | 3.233 | 3.195 | 3.164 |
| HRAD/PAD | 1.595 | 1.582 | 1.504 | 1.474 | 1.420 | 1.350 | 1.343 | 1.355 | 1.330 | 1.317 |
| Jiangxi | HRAD | 2.259 | 2.255 | 2.172 | 2.071 | 1.987 | 1.909 | 1.846 | 1.854 | 2.171 | 2.018 |
| HRAD/PAD | 1.172 | 1.165 | 1.116 | 1.081 | 1.034 | 0.993 | 0.960 | 0.963 | 1.128 | 1.046 |
| Shandong | HRAD | 5.265 | 5.144 | 4.965 | 4.882 | 4.867 | 4.674 | 4.698 | 4.751 | 4.651 | 4.645 |
| HRAD/PAD | 1.185 | 1.151 | 1.105 | 1.072 | 1.063 | 1.016 | 1.018 | 1.024 | 1.002 | 1.001 |
| Central China | HRAD | 2.727 | 2.646 | 2.560 | 2.492 | 2.419 | 2.303 | 2.254 | 2.223 | 2.301 | 2.237 |
| HRAD/PAD | 0.989 | 0.961 | 0.930 | 0.911 | 0.886 | 0.845 | 0.828 | 0.823 | 0.852 | 0.828 |
| Henan | HRAD | 2.779 | 2.835 | 2.850 | 2.835 | 2.915 | 2.820 | 2.749 | 2.813 | 3.196 | 3.029 |
| HRAD/PAD | 0.693 | 0.705 | 0.706 | 0.681 | 0.697 | 0.671 | 0.652 | 0.664 | 0.759 | 0.721 |
| Hubei | HRAD | 2.532 | 2.421 | 2.310 | 2.258 | 2.139 | 2.042 | 1.987 | 1.910 | 1.865 | 1.773 |
| HRAD/PAD | 1.141 | 1.088 | 1.032 | 1.003 | 0.947 | 0.902 | 0.876 | 0.869 | 0.836 | 0.793 |
| Hunan | HRAD | 2.856 | 2.696 | 2.552 | 2.428 | 2.273 | 2.125 | 2.099 | 2.033 | 1.979 | 2.019 |
| HRAD/PAD | 1.271 | 1.192 | 1.120 | 1.092 | 1.021 | 0.954 | 0.941 | 0.911 | 0.890 | 0.910 |
| South China | HRAD | 2.807 | 2.850 | 2.998 | 3.070 | 3.108 | 3.180 | 3.188 | 3.228 | 3.242 | 3.369 |
| HRAD/PAD | 1.099 | 1.113 | 1.166 | 1.131 | 1.132 | 1.147 | 1.142 | 1.146 | 1.146 | 1.191 |
| Guangdong | HRAD | 4.764 | 4.626 | 4.711 | 4.748 | 4.798 | 4.890 | 4.876 | 4.872 | 4.852 | 5.060 |
| HRAD/PAD | 1.131 | 1.090 | 1.097 | 1.008 | 0.999 | 1.001 | 0.986 | 0.975 | 0.967 | 1.010 |
| Guangxi | HRAD | 1.513 | 1.691 | 1.904 | 2.011 | 2.047 | 2.119 | 2.142 | 2.198 | 2.236 | 2.319 |
| HRAD/PAD | 1.071 | 1.188 | 1.326 | 1.383 | 1.394 | 1.431 | 1.436 | 1.463 | 1.483 | 1.535 |
| Hainan | HRAD | 1.556 | 1.615 | 1.644 | 1.662 | 1.643 | 1.628 | 1.640 | 1.795 | 1.824 | 1.831 |
| HRAD/PAD | 0.865 | 0.890 | 0.898 | 0.865 | 0.842 | 0.825 | 0.821 | 0.883 | 0.890 | 0.888 |
| Southwest China | HRAD | 0.417 | 0.431 | 0.437 | 0.444 | 0.445 | 0.466 | 0.480 | 0.487 | 0.495 | 0.508 |
| HRAD/PAD | 0.710 | 0.734 | 0.742 | 0.752 | 0.754 | 0.789 | 0.812 | 0.821 | 0.837 | 0.859 |
| Chongqing | HRAD | 2.248 | 2.311 | 2.415 | 2.372 | 2.266 | 2.445 | 2.492 | 2.472 | 2.574 | 2.564 |
| HRAD/PAD | 0.877 | 0.895 | 0.927 | 0.884 | 0.835 | 0.896 | 0.906 | 0.892 | 0.929 | 0.924 |
| Sichuan | HRAD | 1.185 | 1.191 | 1.154 | 1.147 | 1.146 | 1.167 | 1.204 | 1.202 | 1.205 | 1.250 |
| HRAD/PAD | 0.999 | 1.000 | 0.962 | 0.950 | 0.944 | 0.959 | 0.985 | 0.981 | 0.984 | 1.020 |
| Guizhou | HRAD | 0.616 | 0.698 | 0.789 | 0.870 | 0.948 | 0.988 | 1.036 | 1.079 | 1.075 | 1.089 |
| HRAD/PAD | 0.436 | 0.493 | 0.554 | 0.574 | 0.617 | 0.641 | 0.667 | 0.693 | 0.691 | 0.700 |
| Yunnan | HRAD | 0.282 | 0.305 | 0.321 | 0.338 | 0.333 | 0.376 | 0.382 | 0.403 | 0.427 | 0.443 |
| HRAD/PAD | 0.334 | 0.359 | 0.375 | 0.401 | 0.394 | 0.443 | 0.449 | 0.473 | 0.504 | 0.524 |
| Tibet | HRAD | 0.006 | 0.007 | 0.007 | 0.009 | 0.009 | 0.010 | 0.011 | 0.013 | 0.013 | 0.015 |
| HRAD/PAD | 0.327 | 0.389 | 0.355 | 0.447 | 0.469 | 0.498 | 0.533 | 0.594 | 0.616 | 0.701 |
| Northwest China | HRAD | 0.212 | 0.216 | 0.216 | 0.218 | 0.216 | 0.217 | 0.219 | 0.215 | 0.200 | 0.196 |
| HRAD/PAD | 0.932 | 0.949 | 0.947 | 0.962 | 0.949 | 0.952 | 0.958 | 0.936 | 0.871 | 0.854 |
| Shaanxi | HRAD | 1.494 | 1.517 | 1.524 | 1.563 | 1.546 | 1.538 | 1.566 | 1.542 | 1.358 | 1.337 |
| HRAD/PAD | 1.148 | 1.162 | 1.161 | 1.167 | 1.145 | 1.131 | 1.148 | 1.127 | 0.993 | 0.977 |
| Gansu | HRAD | 0.348 | 0.351 | 0.348 | 0.333 | 0.326 | 0.325 | 0.329 | 0.326 | 0.324 | 0.309 |
| HRAD/PAD | 0.806 | 0.812 | 0.800 | 0.790 | 0.773 | 0.773 | 0.785 | 0.780 | 0.778 | 0.742 |
| Qinghai | HRAD | 0.048 | 0.046 | 0.044 | 0.045 | 0.047 | 0.055 | 0.053 | 0.052 | 0.049 | 0.050 |
| HRAD/PAD | 0.837 | 0.797 | 0.766 | 0.778 | 0.813 | 0.947 | 0.913 | 0.894 | 0.844 | 0.860 |
| Ningxia | HRAD | 0.730 | 0.754 | 0.755 | 0.787 | 0.829 | 0.906 | 0.948 | 0.889 | 0.901 | 0.887 |
| HRAD/PAD | 1.042 | 1.063 | 1.056 | 1.058 | 1.098 | 1.191 | 1.235 | 1.152 | 1.161 | 1.137 |
| Xinjiang | HRAD | 0.069 | 0.072 | 0.074 | 0.076 | 0.073 | 0.070 | 0.068 | 0.067 | 0.062 | 0.062 |
| HRAD/PAD | 0.711 | 0.738 | 0.731 | 0.729 | 0.689 | 0.652 | 0.624 | 0.601 | 0.562 | 0.561 |

**Table S11** Global Moran Index for health technicians in community healthcare institutions

| Year | Health technicians | Physicians | Pharmacists | Nurses |
| --- | --- | --- | --- | --- |
| 2013 | 0.204** | 0.201** | 0.181* | 0.163* |
| 2014 | 0.193* | 0.198* | 0.184* | 0.147* |
| 2015 | 0.175* | 0.189* | 0.178* | 0.121 |
| 2016 | 0.155* | 0.173* | 0.168* | 0.096 |
| 2017 | 0.152* | 0.177* | 0.170* | 0.081 |
| 2018 | 0.145* | 0.177* | 0.171* | 0.075 |
| 2019 | 0.148* | 0.192* | 0.168* | 0.072 |
| 2020 | 0.155* | 0.201** | 0.166* | 0.088 |
| 2021 | 0.150* | 0.195* | 0.162* | 0.097 |
| 2022 | 0.129 | 0.180* | 0.142* | 0.079 |

*, **, *** denote significance at the 10%, 5%, and 1% levels, respectively

**Table S12** Global Moran Index for health technicians in rural healthcare institutions

| Year | Health technicians | Physicians | Pharmacists | Nurses |
| --- | --- | --- | --- | --- |
| 2013 | 0.195* | 0.150* | 0.215** | 0.183* |
| 2014 | 0.193* | 0.153* | 0.224** | 0.187* |
| 2015 | 0.198* | 0.163* | 0.225** | 0.190* |
| 2016 | 0.198* | 0.167* | 0.221** | 0.189* |
| 2017 | 0.181* | 0.148* | 0.213** | 0.160* |
| 2018 | 0.167* | 0.138 | 0.204* | 0.136 |
| 2019 | 0.160* | 0.137 | 0.200* | 0.152* |
| 2020 | 0.171* | 0.162* | 0.213** | 0.182* |
| 2021 | 0.141* | 0.136 | 0.217** | 0.146* |
| 2022 | 0.173* | 0.176* | 0.224** | 0.193* |

*, **, *** denote significance at the 10%, 5%, and 1% levels, respectively


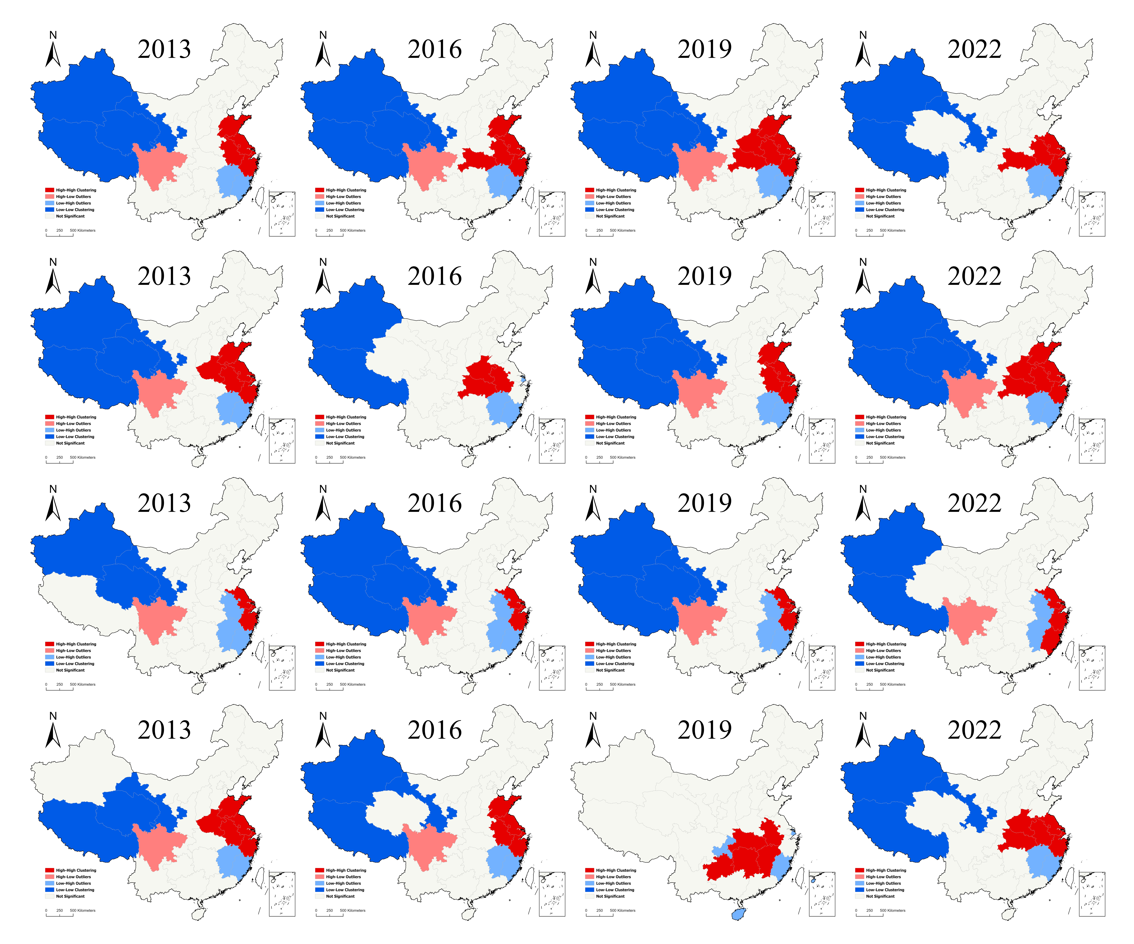


**Figure S1** LISA map of health technicians in community healthcare institutions in China (2014, 2017, 2020, 2022)

*The first act is for health technicians, the second for physicians, the third for pharmacists and the fourth for nurses


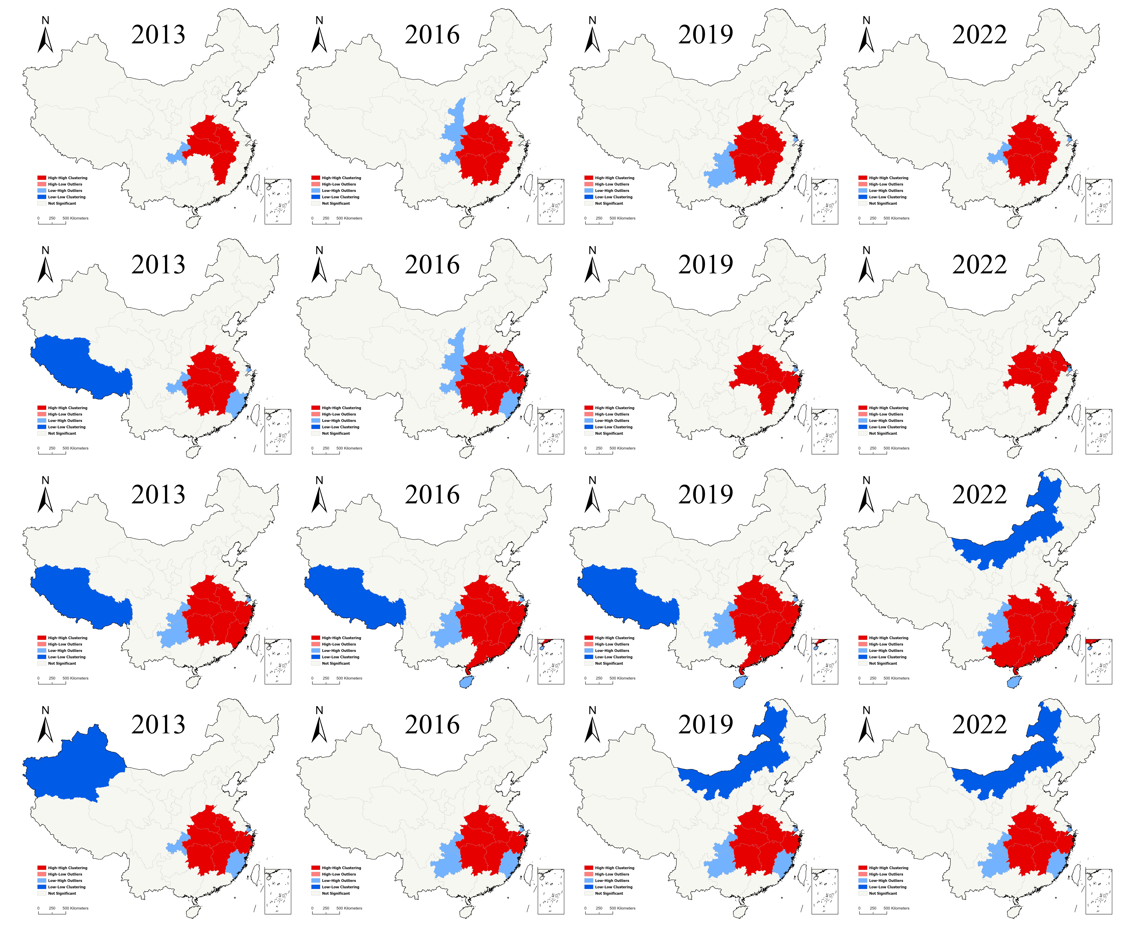


**Figure S2** LISA map of health technicians in rural healthcare institutions in China (2014, 2017, 2020, 2022)

*The first act is for health technicians, the second for physicians, the third for pharmacists and the fourth for nurses

**Table S13** Analysis of the combined effects of two indicators on the spatial distribution of health technicians using the geographical detector (2020)

|  | X1 | X2 | X3 | X4 | X5 | X6 | X7 | X8 | X9 | X10 | X11 | X12 | X13 | X14 | X15 |
| --- | --- | --- | --- | --- | --- | --- | --- | --- | --- | --- | --- | --- | --- | --- | --- |
| X1 | 0.903 |  |  |  |  |  |  |  |  |  |  |  |  |  |  |
| X2 | 0.939 | 0.248 |  |  |  |  |  |  |  |  |  |  |  |  |  |
| X3 | 0.949 | 0.387 | 0.064 |  |  |  |  |  |  |  |  |  |  |  |  |
| X4 | 0.944 | 0.938 | 0.927 | 0.797 |  |  |  |  |  |  |  |  |  |  |  |
| X5 | 0.961 | 0.688 | 0.556 | 0.948 | 0.203 |  |  |  |  |  |  |  |  |  |  |
| X6 | 0.963 | 0.939 | 0.941 | 0.880 | 0.953 | 0.860 |  |  |  |  |  |  |  |  |  |
| X7 | 0.950 | 0.472 | 0.453 | 0.962 | 0.417 | 0.968 | 0.031 |  |  |  |  |  |  |  |  |
| X8 | 0.955 | 0.608 | 0.324 | 0.950 | 0.511 | 0.960 | 0.290 | 0.110 |  |  |  |  |  |  |  |
| X9 | 0.922 | 0.849 | 0.724 | 0.941 | 0.925 | 0.958 | 0.859 | 0.760 | 0.649 |  |  |  |  |  |  |
| X10 | 0.922 | 0.714 | 0.721 | 0.895 | 0.490 | 0.915 | 0.626 | 0.552 | 0.900 | 0.337 |  |  |  |  |  |
| X11 | 0.927 | 0.422 | 0.252 | 0.918 | 0.498 | 0.931 | 0.350 | 0.335 | 0.788 | 0.588 | 0.062 |  |  |  |  |
| X12 | 0.932 | 0.927 | 0.928 | 0.963 | 0.952 | 0.985 | 0.943 | 0.921 | 0.920 | 0.884 | 0.916 | 0.845 |  |  |  |
| X13 | 0.945 | 0.798 | 0.784 | 0.895 | 0.807 | 0.957 | 0.872 | 0.848 | 0.910 | 0.790 | 0.851 | 0.867 | 0.714 |  |  |
| X14 | 0.972 | 0.551 | 0.275 | 0.952 | 0.488 | 0.966 | 0.561 | 0.420 | 0.769 | 0.561 | 0.439 | 0.950 | 0.757 | 0.113 |  |
| X15 | 0.933 | 0.648 | 0.493 | 0.948 | 0.624 | 0.957 | 0.696 | 0.622 | 0.698 | 0.747 | 0.657 | 0.907 | 0.766 | 0.566 | 0.371 |

**Table S14** Analysis of the combined effects of two indicators on the spatial distribution of physicians using the geographical detector (2020)

|  | X1 | X2 | X3 | X4 | X5 | X6 | X7 | X8 | X9 | X10 | X11 | X12 | X13 | X14 | X15 |
| --- | --- | --- | --- | --- | --- | --- | --- | --- | --- | --- | --- | --- | --- | --- | --- |
| X1 | 0.923 |  |  |  |  |  |  |  |  |  |  |  |  |  |  |
| X2 | 0.939 | 0.266 |  |  |  |  |  |  |  |  |  |  |  |  |  |
| X3 | 0.958 | 0.395 | 0.060 |  |  |  |  |  |  |  |  |  |  |  |  |
| X4 | 0.955 | 0.953 | 0.942 | 0.811 |  |  |  |  |  |  |  |  |  |  |  |
| X5 | 0.977 | 0.701 | 0.529 | 0.979 | 0.189 |  |  |  |  |  |  |  |  |  |  |
| X6 | 0.964 | 0.936 | 0.944 | 0.882 | 0.970 | 0.853 |  |  |  |  |  |  |  |  |  |
| X7 | 0.940 | 0.465 | 0.419 | 0.965 | 0.426 | 0.973 | 0.033 |  |  |  |  |  |  |  |  |
| X8 | 0.951 | 0.612 | 0.301 | 0.937 | 0.464 | 0.956 | 0.309 | 0.075 |  |  |  |  |  |  |  |
| X9 | 0.939 | 0.864 | 0.749 | 0.970 | 0.943 | 0.969 | 0.870 | 0.776 | 0.690 |  |  |  |  |  |  |
| X10 | 0.938 | 0.679 | 0.669 | 0.928 | 0.437 | 0.906 | 0.605 | 0.479 | 0.896 | 0.307 |  |  |  |  |  |
| X11 | 0.942 | 0.479 | 0.238 | 0.903 | 0.435 | 0.934 | 0.376 | 0.304 | 0.836 | 0.591 | 0.026 |  |  |  |  |
| X12 | 0.946 | 0.897 | 0.873 | 0.961 | 0.919 | 0.970 | 0.888 | 0.882 | 0.892 | 0.838 | 0.914 | 0.793 |  |  |  |
| X13 | 0.956 | 0.779 | 0.724 | 0.896 | 0.785 | 0.957 | 0.803 | 0.759 | 0.923 | 0.768 | 0.821 | 0.816 | 0.654 |  |  |
| X14 | 0.963 | 0.562 | 0.285 | 0.957 | 0.421 | 0.953 | 0.530 | 0.380 | 0.827 | 0.511 | 0.377 | 0.945 | 0.736 | 0.104 |  |
| X15 | 0.938 | 0.637 | 0.489 | 0.953 | 0.574 | 0.947 | 0.652 | 0.639 | 0.757 | 0.702 | 0.652 | 0.881 | 0.713 | 0.510 | 0.368 |

**Table S15** Analysis of the combined effects of two indicators on the spatial distribution of health technicians using the geographical detector (2021)

|  | X1 | X2 | X3 | X4 | X5 | X6 | X7 | X8 | X9 | X10 | X11 | X12 | X13 | X14 | X15 |
| --- | --- | --- | --- | --- | --- | --- | --- | --- | --- | --- | --- | --- | --- | --- | --- |
| X1 | 0.912 |  |  |  |  |  |  |  |  |  |  |  |  |  |  |
| X2 | 0.952 | 0.255 |  |  |  |  |  |  |  |  |  |  |  |  |  |
| X3 | 0.962 | 0.531 | 0.086 |  |  |  |  |  |  |  |  |  |  |  |  |
| X4 | 0.959 | 0.925 | 0.932 | 0.807 |  |  |  |  |  |  |  |  |  |  |  |
| X5 | 0.956 | 0.658 | 0.512 | 0.942 | 0.146 |  |  |  |  |  |  |  |  |  |  |
| X6 | 0.964 | 0.931 | 0.940 | 0.833 | 0.948 | 0.811 |  |  |  |  |  |  |  |  |  |
| X7 | 0.955 | 0.630 | 0.485 | 0.925 | 0.444 | 0.957 | 0.039 |  |  |  |  |  |  |  |  |
| X8 | 0.943 | 0.356 | 0.355 | 0.908 | 0.611 | 0.923 | 0.329 | 0.083 |  |  |  |  |  |  |  |
| X9 | 0.927 | 0.880 | 0.839 | 0.951 | 0.896 | 0.954 | 0.945 | 0.860 | 0.730 |  |  |  |  |  |  |
| X10 | 0.931 | 0.740 | 0.678 | 0.868 | 0.553 | 0.904 | 0.624 | 0.658 | 0.915 | 0.385 |  |  |  |  |  |
| X11 | 0.937 | 0.688 | 0.602 | 0.927 | 0.615 | 0.915 | 0.502 | 0.630 | 0.910 | 0.718 | 0.226 |  |  |  |  |
| X12 | 0.938 | 0.912 | 0.948 | 0.981 | 0.946 | 0.989 | 0.946 | 0.900 | 0.885 | 0.883 | 0.930 | 0.844 |  |  |  |
| X13 | 0.947 | 0.769 | 0.802 | 0.924 | 0.854 | 0.952 | 0.819 | 0.853 | 0.850 | 0.790 | 0.842 | 0.864 | 0.714 |  |  |
| X14 | 0.976 | 0.553 | 0.386 | 0.964 | 0.401 | 0.964 | 0.609 | 0.449 | 0.823 | 0.593 | 0.463 | 0.950 | 0.761 | 0.184 |  |
| X15 | 0.944 | 0.592 | 0.464 | 0.942 | 0.557 | 0.949 | 0.709 | 0.676 | 0.783 | 0.776 | 0.658 | 0.903 | 0.760 | 0.576 | 0.368 |

**Table S16** Analysis of the combined effects of two indicators on the spatial distribution of physicians using the geographical detector (2021)

|  | X1 | X2 | X3 | X4 | X5 | X6 | X7 | X8 | X9 | X10 | X11 | X12 | X13 | X14 | X15 |
| --- | --- | --- | --- | --- | --- | --- | --- | --- | --- | --- | --- | --- | --- | --- | --- |
| X1 | 0.931 |  |  |  |  |  |  |  |  |  |  |  |  |  |  |
| X2 | 0.943 | 0.276 |  |  |  |  |  |  |  |  |  |  |  |  |  |
| X3 | 0.972 | 0.529 | 0.078 |  |  |  |  |  |  |  |  |  |  |  |  |
| X4 | 0.962 | 0.910 | 0.950 | 0.788 |  |  |  |  |  |  |  |  |  |  |  |
| X5 | 0.973 | 0.666 | 0.468 | 0.941 | 0.127 |  |  |  |  |  |  |  |  |  |  |
| X6 | 0.965 | 0.911 | 0.950 | 0.813 | 0.951 | 0.786 |  |  |  |  |  |  |  |  |  |
| X7 | 0.961 | 0.630 | 0.445 | 0.931 | 0.417 | 0.955 | 0.033 |  |  |  |  |  |  |  |  |
| X8 | 0.951 | 0.412 | 0.339 | 0.890 | 0.651 | 0.908 | 0.304 | 0.092 |  |  |  |  |  |  |  |
| X9 | 0.946 | 0.891 | 0.853 | 0.965 | 0.905 | 0.964 | 0.948 | 0.896 | 0.771 |  |  |  |  |  |  |
| X10 | 0.940 | 0.692 | 0.622 | 0.851 | 0.509 | 0.875 | 0.652 | 0.639 | 0.919 | 0.342 |  |  |  |  |  |
| X11 | 0.950 | 0.738 | 0.629 | 0.889 | 0.598 | 0.883 | 0.470 | 0.630 | 0.914 | 0.696 | 0.189 |  |  |  |  |
| X12 | 0.953 | 0.859 | 0.896 | 0.973 | 0.893 | 0.973 | 0.903 | 0.869 | 0.869 | 0.835 | 0.930 | 0.800 |  |  |  |
| X13 | 0.957 | 0.707 | 0.730 | 0.921 | 0.810 | 0.949 | 0.752 | 0.831 | 0.861 | 0.738 | 0.810 | 0.821 | 0.647 |  |  |
| X14 | 0.967 | 0.569 | 0.351 | 0.947 | 0.378 | 0.949 | 0.564 | 0.443 | 0.860 | 0.546 | 0.399 | 0.948 | 0.733 | 0.158 |  |
| X15 | 0.948 | 0.593 | 0.465 | 0.927 | 0.517 | 0.937 | 0.658 | 0.653 | 0.842 | 0.729 | 0.646 | 0.882 | 0.703 | 0.518 | 0.370 |

**Table S17** Analysis of the combined effects of two indicators on the spatial distribution of health technicians using the geographical detector (2022)

|  | X1 | X2 | X3 | X4 | X5 | X6 | X7 | X8 | X9 | X10 | X11 | X12 | X13 | X14 | X15 |
| --- | --- | --- | --- | --- | --- | --- | --- | --- | --- | --- | --- | --- | --- | --- | --- |
| X1 | 0.915 |  |  |  |  |  |  |  |  |  |  |  |  |  |  |
| X2 | 0.948 | 0.362 |  |  |  |  |  |  |  |  |  |  |  |  |  |
| X3 | 0.973 | 0.691 | 0.092 |  |  |  |  |  |  |  |  |  |  |  |  |
| X4 | 0.956 | 0.906 | 0.960 | 0.798 |  |  |  |  |  |  |  |  |  |  |  |
| X5 | 0.959 | 0.719 | 0.492 | 0.935 | 0.147 |  |  |  |  |  |  |  |  |  |  |
| X6 | 0.961 | 0.905 | 0.951 | 0.821 | 0.940 | 0.798 |  |  |  |  |  |  |  |  |  |
| X7 | 0.955 | 0.841 | 0.396 | 0.931 | 0.423 | 0.954 | 0.092 |  |  |  |  |  |  |  |  |
| X8 | 0.940 | 0.533 | 0.429 | 0.920 | 0.530 | 0.934 | 0.277 | 0.057 |  |  |  |  |  |  |  |
| X9 | 0.931 | 0.884 | 0.911 | 0.941 | 0.890 | 0.946 | 0.943 | 0.810 | 0.725 |  |  |  |  |  |  |
| X10 | 0.959 | 0.840 | 0.678 | 0.864 | 0.556 | 0.887 | 0.670 | 0.736 | 0.925 | 0.377 |  |  |  |  |  |
| X11 | 0.941 | 0.567 | 0.529 | 0.881 | 0.532 | 0.873 | 0.504 | 0.256 | 0.844 | 0.684 | 0.140 |  |  |  |  |
| X12 | 0.937 | 0.896 | 0.958 | 0.969 | 0.924 | 0.979 | 0.955 | 0.901 | 0.871 | 0.933 | 0.846 | 0.792 |  |  |  |
| X13 | 0.949 | 0.842 | 0.905 | 0.972 | 0.820 | 0.977 | 0.864 | 0.890 | 0.869 | 0.906 | 0.848 | 0.819 | 0.752 |  |  |
| X14 | 0.977 | 0.575 | 0.365 | 0.961 | 0.389 | 0.959 | 0.469 | 0.377 | 0.818 | 0.686 | 0.386 | 0.864 | 0.809 | 0.184 |  |
| X15 | 0.948 | 0.573 | 0.541 | 0.940 | 0.555 | 0.938 | 0.649 | 0.669 | 0.782 | 0.859 | 0.625 | 0.823 | 0.781 | 0.573 | 0.362 |

**Table S18** Analysis of the combined effects of two indicators on the spatial distribution of physicians using the geographical detector (2022)

|  | X1 | X2 | X3 | X4 | X5 | X6 | X7 | X8 | X9 | X10 | X11 | X12 | X13 | X14 | X15 |
| --- | --- | --- | --- | --- | --- | --- | --- | --- | --- | --- | --- | --- | --- | --- | --- |
| X1 | 0.938 |  |  |  |  |  |  |  |  |  |  |  |  |  |  |
| X2 | 0.947 | 0.380 |  |  |  |  |  |  |  |  |  |  |  |  |  |
| X3 | 0.977 | 0.742 | 0.135 |  |  |  |  |  |  |  |  |  |  |  |  |
| X4 | 0.964 | 0.892 | 0.957 | 0.781 |  |  |  |  |  |  |  |  |  |  |  |
| X5 | 0.979 | 0.722 | 0.505 | 0.937 | 0.129 |  |  |  |  |  |  |  |  |  |  |
| X6 | 0.966 | 0.888 | 0.949 | 0.801 | 0.945 | 0.774 |  |  |  |  |  |  |  |  |  |
| X7 | 0.961 | 0.824 | 0.401 | 0.915 | 0.398 | 0.952 | 0.083 |  |  |  |  |  |  |  |  |
| X8 | 0.952 | 0.568 | 0.451 | 0.903 | 0.488 | 0.912 | 0.264 | 0.054 |  |  |  |  |  |  |  |
| X9 | 0.951 | 0.898 | 0.918 | 0.958 | 0.900 | 0.957 | 0.944 | 0.834 | 0.769 |  |  |  |  |  |  |
| X10 | 0.968 | 0.833 | 0.724 | 0.840 | 0.580 | 0.866 | 0.657 | 0.713 | 0.955 | 0.380 |  |  |  |  |  |
| X11 | 0.956 | 0.618 | 0.569 | 0.850 | 0.509 | 0.866 | 0.475 | 0.255 | 0.860 | 0.681 | 0.127 |  |  |  |  |
| X12 | 0.959 | 0.849 | 0.965 | 0.971 | 0.881 | 0.972 | 0.937 | 0.908 | 0.870 | 0.921 | 0.822 | 0.750 |  |  |  |
| X13 | 0.948 | 0.778 | 0.879 | 0.944 | 0.746 | 0.950 | 0.782 | 0.854 | 0.866 | 0.850 | 0.779 | 0.779 | 0.671 |  |  |
| X14 | 0.970 | 0.585 | 0.365 | 0.944 | 0.361 | 0.945 | 0.420 | 0.345 | 0.854 | 0.674 | 0.350 | 0.863 | 0.759 | 0.156 |  |
| X15 | 0.954 | 0.579 | 0.562 | 0.926 | 0.522 | 0.929 | 0.600 | 0.613 | 0.842 | 0.866 | 0.648 | 0.788 | 0.714 | 0.514 | 0.367 |
